# Supplementary material for: Homogeneous core–shell NiCo2S4 nanostructures supported on nickel foam for supercapacitors
Source: Royal Society of Chemistry journal article supplement (doi:10.1039/c5ta02432c), 2015-01-01
Supplement: c5ta02432c1.pdf [file c5ta02432c1.pdf]

## Electronic Supporting Information

### **Homogeneous core-shell NiCo<sub>2</sub>S<sub>4</sub> nanostructure supported on nickel foam for supercapacitors**

Wei Kong,<sup>†</sup> Chenchen Lu,<sup>†</sup> Wu Zhang<sup>†,\*</sup>, Jun Pu,<sup>‡</sup> and Zhenghua Wang<sup>†,\*</sup>

<sup>†</sup>*Key Laboratory of Functional Molecular Solids, Ministry of Education, College of Chemistry and Materials Science, Anhui Normal University, Wuhu 241000, P. R. China*

<sup>‡</sup>*Suzhou Institute of Nanotech and Nanobionics, Chinese Academy of Sciences, 398 Ruoshui Road, Suzhou Industry Park, Suzhou 215123, P. R. China*

*\*Corresponding author. Tel.: +86-553-3869303; Fax: +86-553-3869302; E-mail: zhangwu@mail.ahnu.edu.cn (W. Zhang), zhwang@mail.ahnu.edu.cn (Z. Wang).*

**Figure S1.** Photographs of (a) nickel foam, (b) precursor loaded nickel foam and (c)  $\text{NiCo}_2\text{S}_4$  loaded nickel foam.

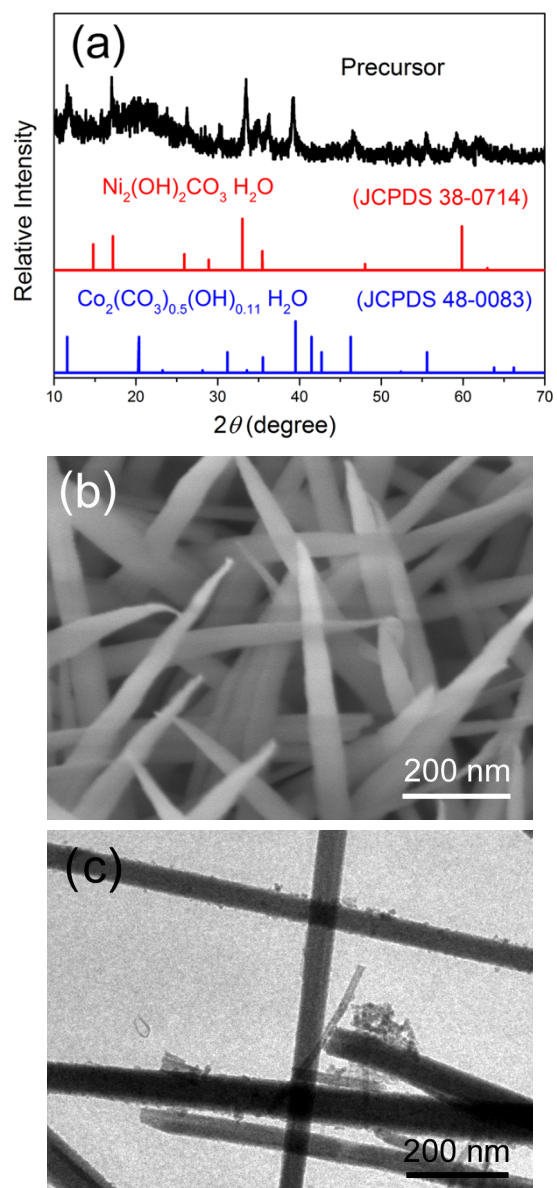

**Figure S2.** (a) XRD, (b) SEM and (c) TEM images of the precursor.

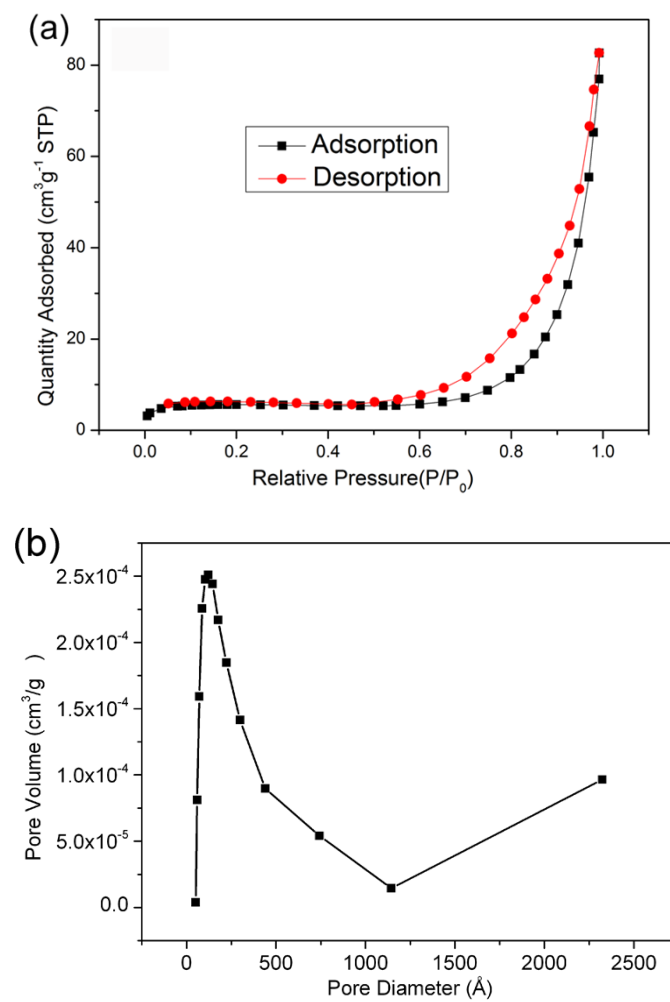

**Figure S3.** (a) N<sub>2</sub> adsorption and desorption isotherm, (b) BJH pore size distribution of the core-shell NiCo<sub>2</sub>S<sub>4</sub> sample.

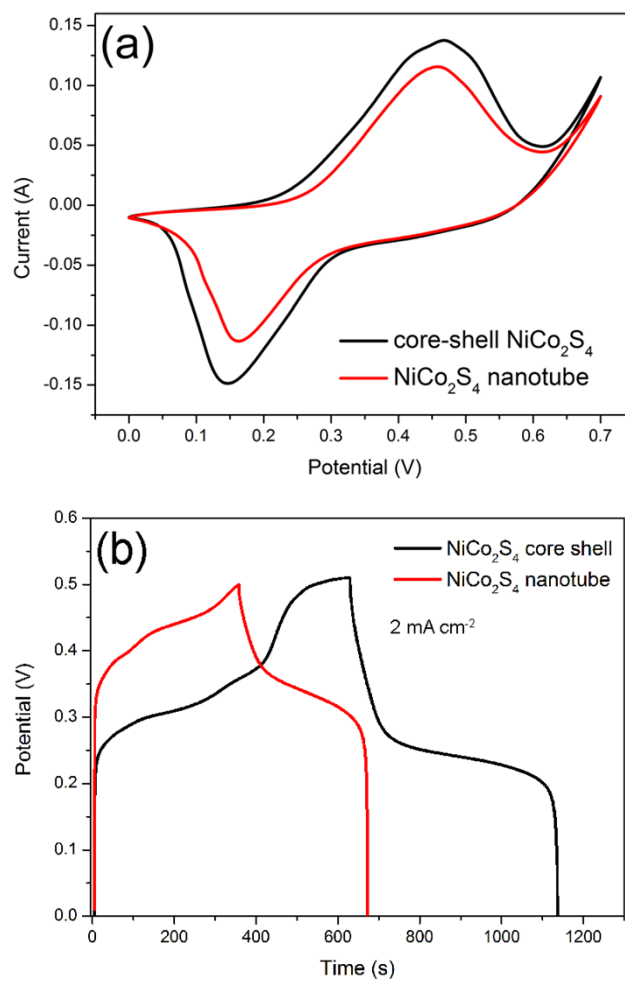

**Figure S4.** (a) CV curves of core-shell structured  $\text{NiCo}_2\text{S}_4$  and  $\text{NiCo}_2\text{S}_4$  nanotubes; (b) charge-discharge curves of core-shell structured  $\text{NiCo}_2\text{S}_4$  and  $\text{NiCo}_2\text{S}_4$  nanotubes.

**Figure S5.** (a) CV curves of the porous carbon; (b) charge–discharge curves of the porous carbon.

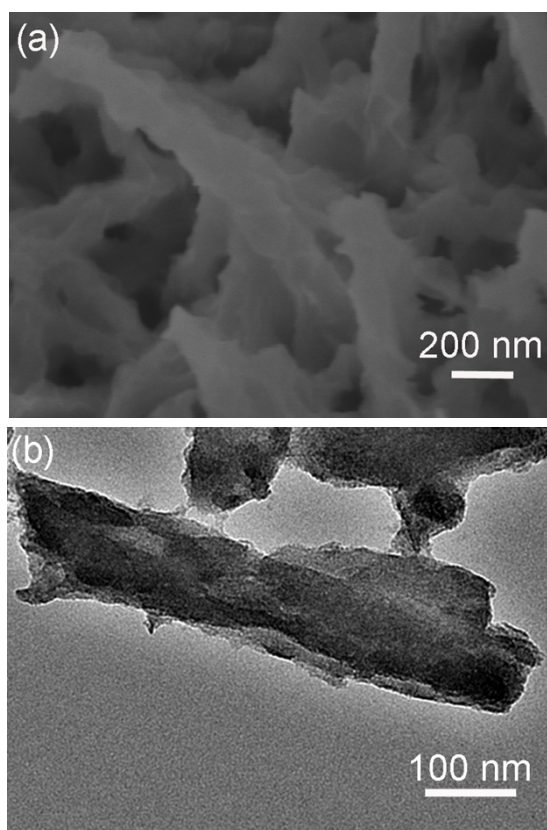

**Figure S6.** (a) SEM and (b) TEM images of  $\text{NiCo}_2\text{S}_4$  sample after 5000 cycles.

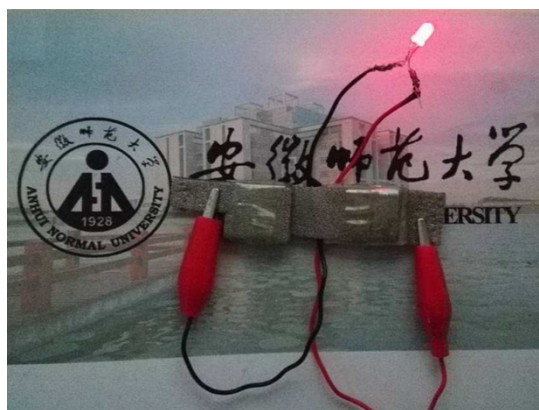

**Figure S7.** Photograph of a red LED lighted up by two  $\text{NiCo}_2\text{S}_4/\text{C}$  devices in series.
